# Supplementary material
Source: HighWire-hosted journal article supplement (https://qualitysafety.bmj.com/content/26/11/938)
Supplement: inline-supplementary-material-1 [file inline-supplementary-material-1.pdf]

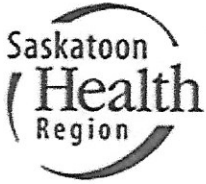

- RUH     SCH     SPH  
 OTHER: \_\_\_\_\_

| Cardiosciences Admission Order Set                                                                                                                                                           | ACTION |     |     |    |
|----------------------------------------------------------------------------------------------------------------------------------------------------------------------------------------------|--------|-----|-----|----|
|                                                                                                                                                                                              | MAR    | ICP | REQ | RN |
| ***Ensure Medication Reconciliation Form has been reviewed***                                                                                                                                |        |     |     |    |
| Admit to: _____ MRP                                                                                                                                                                          |        |     |     |    |
| Diagnosis: _____                                                                                                                                                                             |        |     |     |    |
| Precautions: <input type="checkbox"/> Contact <input type="checkbox"/> Droplet <input type="checkbox"/> Airborne <input type="checkbox"/> Other - Reason: _____                              |        |     |     |    |
| <b>Care Directives</b>                                                                                                                                                                       |        |     |     |    |
| <input checked="" type="checkbox"/> Complete Resuscitation Care Plan Order (form # 102527)                                                                                                   |        |     |     |    |
| <input type="checkbox"/> Patient/ Family decision pending <input type="checkbox"/> Advance Care Directive (on the health record)                                                             |        |     |     |    |
| <b>Consults</b>                                                                                                                                                                              |        |     |     |    |
| <input checked="" type="checkbox"/> Fax page 1 and 2 of Patient Profile to LiveWell Cardiac Rehab Program                                                                                    |        |     |     |    |
| <input type="checkbox"/> Other: _____ Reason: _____                                                                                                                                          |        |     |     |    |
| <b>Diet</b>                                                                                                                                                                                  |        |     |     |    |
| <input type="checkbox"/> NPO <input type="checkbox"/> Regular <input type="checkbox"/> Heart Healthy <input type="checkbox"/> 2 g Na restricted <input type="checkbox"/> Diabetic _____ kcal |        |     |     |    |
| <input type="checkbox"/> Other: _____                                                                                                                                                        |        |     |     |    |
| <b>Activity</b>                                                                                                                                                                              |        |     |     |    |
| <input type="checkbox"/> Other: _____                                                                                                                                                        |        |     |     |    |
| <b>Vitals/Monitoring</b>                                                                                                                                                                     |        |     |     |    |
| <b>Vitals</b>                                                                                                                                                                                |        |     |     |    |
| <input type="checkbox"/> Weigh daily <input checked="" type="checkbox"/> For CHF patients, daily weight in am prior to breakfast                                                             |        |     |     |    |
| <input checked="" type="checkbox"/> Vital Signs <input type="checkbox"/> Routine <input type="checkbox"/> q _____ h and PRN                                                                  |        |     |     |    |
| <b>Monitoring</b>                                                                                                                                                                            |        |     |     |    |
| <input type="checkbox"/> Intake and Output q _____ h                                                                                                                                         |        |     |     |    |
| <input type="checkbox"/> Cardiac Monitoring                                                                                                                                                  |        |     |     |    |
| <input type="checkbox"/> Telemetry may be interrupted for off-unit diagnostic tests and/or procedures                                                                                        |        |     |     |    |
| <b>Lab Investigations</b>                                                                                                                                                                    |        |     |     |    |
| <b>Lab Investigations on admission (if not already done in ER)</b>                                                                                                                           |        |     |     |    |
| <input type="checkbox"/> CBC <input type="checkbox"/> APTT <input type="checkbox"/> INR                                                                                                      |        |     |     |    |
| <input type="checkbox"/> Na, K, Cl, Creatinine, BUN, Bicarb (lytes 6)                                                                                                                        |        |     |     |    |
| <input type="checkbox"/> Ca, Mg <input type="checkbox"/> HDL, LDL, Total Cholesterol, Triglycerides                                                                                          |        |     |     |    |
| <input type="checkbox"/> High sensitivity Troponin <input type="checkbox"/> CPK q8h x 3 <input type="checkbox"/> Digoxin level                                                               |        |     |     |    |
| <input type="checkbox"/> ALT, ALP, Bili <input type="checkbox"/> AST                                                                                                                         |        |     |     |    |
| <input type="checkbox"/> HgbA1C                                                                                                                                                              |        |     |     |    |
| Additional Labs: _____                                                                                                                                                                       |        |     |     |    |
| <b>Additional Lab Investigations</b>                                                                                                                                                         |        |     |     |    |
| <input type="checkbox"/> CBC daily x 3                                                                                                                                                       |        |     |     |    |
| <input type="checkbox"/> Na, K, Cl, Creatinine, BUN, Bicarb (lytes 6) daily x 3                                                                                                              |        |     |     |    |
| <input checked="" type="checkbox"/> APTT and INR daily for patients on warfarin or IV heparin                                                                                                |        |     |     |    |
| _____ PRACTITIONER PRINTED NAME                      _____ PRACTITIONER SIGNATURE                      _____ DATE/TIME                                                                       |        |     |     |    |

*Notice of confidentiality: Contains information that is time sensitive or confidential. Use, disclosure, copying or communication of the contents is prohibited. If you have received in error, notify the SHR Pharmacy Manager, Operations (306-655-6695).*

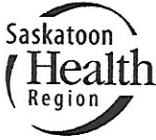

| <b>Cardiosciences Admission Order Set</b>                                                                                                                                                    |  | <b>ACTION</b>                |     |                 |    |
|----------------------------------------------------------------------------------------------------------------------------------------------------------------------------------------------|--|------------------------------|-----|-----------------|----|
|                                                                                                                                                                                              |  | MAR                          | ICP | REQ             | RN |
| ***Ensure Medication Reconciliation Form has been reviewed***                                                                                                                                |  |                              |     |                 |    |
| Admit to: _____ MRP                                                                                                                                                                          |  |                              |     |                 |    |
| Diagnosis: _____                                                                                                                                                                             |  |                              |     |                 |    |
| Precautions: <input type="checkbox"/> Contact <input type="checkbox"/> Droplet <input type="checkbox"/> Airborne <input type="checkbox"/> Other -Reason: _____                               |  |                              |     |                 |    |
| <b>Care Directives</b>                                                                                                                                                                       |  |                              |     |                 |    |
| <input checked="" type="checkbox"/> Complete Resuscitation Care Plan Order (form # 102527)                                                                                                   |  |                              |     |                 |    |
| <input type="checkbox"/> Patient/ Family decision pending <input type="checkbox"/> Advance Care Directive (on the health record)                                                             |  |                              |     |                 |    |
| <b>Consults</b>                                                                                                                                                                              |  |                              |     |                 |    |
| <input checked="" type="checkbox"/> Fax page 1 and 2 of Patient Profile to LiveWell Cardiac Rehab Program                                                                                    |  |                              |     |                 |    |
| <input type="checkbox"/> Other: _____ Reason: _____                                                                                                                                          |  |                              |     |                 |    |
| <b>Diet</b>                                                                                                                                                                                  |  |                              |     |                 |    |
| <input type="checkbox"/> NPO <input type="checkbox"/> Regular <input type="checkbox"/> Heart Healthy <input type="checkbox"/> 2 g Na restricted <input type="checkbox"/> Diabetic _____ kcal |  |                              |     |                 |    |
| <input type="checkbox"/> Other: _____                                                                                                                                                        |  |                              |     |                 |    |
| <b>Activity</b>                                                                                                                                                                              |  |                              |     |                 |    |
| <input type="checkbox"/> Other: _____                                                                                                                                                        |  |                              |     |                 |    |
| <b>Vitals/Monitoring</b>                                                                                                                                                                     |  |                              |     |                 |    |
| <b>Vitals</b>                                                                                                                                                                                |  |                              |     |                 |    |
| <input type="checkbox"/> Weigh daily <input checked="" type="checkbox"/> For CHF patients, daily weight in am prior to breakfast                                                             |  |                              |     |                 |    |
| <input checked="" type="checkbox"/> Vital Signs <input type="checkbox"/> Routine <input type="checkbox"/> q _____ h and PRN                                                                  |  |                              |     |                 |    |
| <b>Monitoring</b>                                                                                                                                                                            |  |                              |     |                 |    |
| <input type="checkbox"/> Intake and Output q _____ h                                                                                                                                         |  |                              |     |                 |    |
| <input type="checkbox"/> Cardiac Monitoring                                                                                                                                                  |  |                              |     |                 |    |
| <input type="checkbox"/> Telemetry may be interrupted for off-unit diagnostic tests and/or procedures                                                                                        |  |                              |     |                 |    |
| <b>Lab Investigations</b>                                                                                                                                                                    |  |                              |     |                 |    |
| <b>Lab Investigations on admission (if not already done in ER)</b>                                                                                                                           |  |                              |     |                 |    |
| <input type="checkbox"/> CBC <input type="checkbox"/> APTT <input type="checkbox"/> INR                                                                                                      |  |                              |     |                 |    |
| <input type="checkbox"/> Na, K, Cl, Creatinine, BUN, Bicarb (lytes 6)                                                                                                                        |  |                              |     |                 |    |
| <input type="checkbox"/> Ca, Mg <input type="checkbox"/> HDL, LDL, Total Cholesterol, Triglycerides                                                                                          |  |                              |     |                 |    |
| <input type="checkbox"/> High sensitivity Troponin <input type="checkbox"/> CPK q8h x 3 <input type="checkbox"/> Digoxin level                                                               |  |                              |     |                 |    |
| <input type="checkbox"/> ALT, ALP, Bili <input type="checkbox"/> AST                                                                                                                         |  |                              |     |                 |    |
| <input type="checkbox"/> TSH <input type="checkbox"/> HgbA1C <input type="checkbox"/> NT-proBNP                                                                                              |  |                              |     |                 |    |
| Additional Labs: _____                                                                                                                                                                       |  |                              |     |                 |    |
| <b>Additional Lab Investigations</b>                                                                                                                                                         |  |                              |     |                 |    |
| <input type="checkbox"/> CBC daily x 3                                                                                                                                                       |  |                              |     |                 |    |
| <input type="checkbox"/> Na, K, Cl, Creatinine, BUN, Bicarb (lytes 6) daily x 3                                                                                                              |  |                              |     |                 |    |
| <input checked="" type="checkbox"/> APTT and INR daily for patients on warfarin or IV heparin                                                                                                |  |                              |     |                 |    |
| PRACTITIONER PRINTED NAME _____                                                                                                                                                              |  | PRACTITIONER SIGNATURE _____ |     | DATE/TIME _____ |    |

*Notice of confidentiality: Contains information that is time sensitive or confidential. Use, disclosure, copying or communication of the contents is prohibited. If you have received in error, notify the SHR Pharmacy Manager, Operations (306-655-6695).*

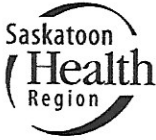

| Cardiosciences Admission Order Set                                                                                                                                                                                                                                                                                                                                                                                                                                                                                         | ACTION                          |                    |     |    |
|----------------------------------------------------------------------------------------------------------------------------------------------------------------------------------------------------------------------------------------------------------------------------------------------------------------------------------------------------------------------------------------------------------------------------------------------------------------------------------------------------------------------------|---------------------------------|--------------------|-----|----|
|                                                                                                                                                                                                                                                                                                                                                                                                                                                                                                                            | MAR                             | ICP                | REQ | RN |
| <b>Additional Lab Investigations continued?..</b><br><input type="checkbox"/> Blood C + S x 2 if T greater than/equal to 38.5°C<br>Follow-up Labs: _____                                                                                                                                                                                                                                                                                                                                                                   |                                 |                    |     |    |
| <b>Diagnostics</b><br><b>Investigations on admission (if not already done in ER)</b><br><input type="checkbox"/> CXR -Reason: _____<br><b>Cardiac</b><br><input type="checkbox"/> Stress test -Reason: _____<br><input type="checkbox"/> 2D Echo -Reason: _____<br><input type="checkbox"/> Cardiac Catheterization: Reason _____<br><input type="checkbox"/> MIBI Scan -Reason: _____<br><input type="checkbox"/> Other -Reason: _____                                                                                    |                                 |                    |     |    |
| <b>Additional Investigations</b><br><input checked="" type="checkbox"/> ECG STAT with symptoms suggestive of ischemia and notify MD<br><input type="checkbox"/> ECG daily x 3 days                                                                                                                                                                                                                                                                                                                                         |                                 |                    |     |    |
| <b>Antiplatelets</b><br><input type="checkbox"/> EC acetylsalicylic acid 81 mg PO daily<br><input type="checkbox"/> clopidogrel 300 mg PO now<br><b>THEN</b> <input type="checkbox"/> clopidogrel 75 mg PO daily<br><b>OR</b><br><input type="checkbox"/> ticagrelor 180 mg PO now<br><b>THEN</b> <input type="checkbox"/> ticagrelor 90 mg PO BID<br><input type="checkbox"/> Other: _____                                                                                                                                |                                 |                    |     |    |
| <b>Anticoagulation (Choose only one)</b><br><input checked="" type="checkbox"/> If Creatinine Clearance less than 30 mL/minute or on dialysis, use heparin - see Appendix A on reverse<br><input type="checkbox"/> heparin as per CARDIOVASCULAR indications, LOW INTENSITY HEPARIN NOMOGRAM (form #100749)<br><b>OR</b><br><input type="checkbox"/> enoxaparin (1 mg/kg) _____ mg Subcutaneous BID<br><b>OR</b><br><input type="checkbox"/> fondaparinux 2.5 mg subcutaneous daily. Time first dose administered: _____ h |                                 |                    |     |    |
| <b>VTE Prophylaxis</b><br><input checked="" type="checkbox"/> Complete the Venous Thromboembolism Prophylaxis Orders Set (form #103621)                                                                                                                                                                                                                                                                                                                                                                                    |                                 |                    |     |    |
| <b>Beta Blocker</b><br><input type="checkbox"/> _____                                                                                                                                                                                                                                                                                                                                                                                                                                                                      |                                 |                    |     |    |
| _____<br>PRACTITIONER PRINTED NAME                                                                                                                                                                                                                                                                                                                                                                                                                                                                                         | _____<br>PRACTITIONER SIGNATURE | _____<br>DATE/TIME |     |    |

Notice of confidentiality: Contains information that is time sensitive or confidential. Use, disclosure, copying or communication of the contents is prohibited. If you have received in error, notify the SHR Pharmacy Manager, Operations (306-655-6695).

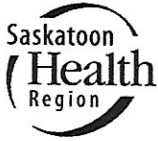

**SASKATOON HEALTH REGION**  
 Saskatoon, Saskatchewan

RUH  SCH  SPH  Other\_\_\_\_\_

| <b>Cardiosciences Admission Order Set</b>                                                                                                                                                                                                                                                                                                                                                                                                                                                                               |  |  | ACTION                                             |     |     |                                       |  |
|-------------------------------------------------------------------------------------------------------------------------------------------------------------------------------------------------------------------------------------------------------------------------------------------------------------------------------------------------------------------------------------------------------------------------------------------------------------------------------------------------------------------------|--|--|----------------------------------------------------|-----|-----|---------------------------------------|--|
|                                                                                                                                                                                                                                                                                                                                                                                                                                                                                                                         |  |  | MAR                                                | ICP | REQ | RN                                    |  |
| <p><b>ACE Inhibitor / ARB</b><br/> <input type="checkbox"/> _____</p>                                                                                                                                                                                                                                                                                                                                                                                                                                                   |  |  |                                                    |     |     |                                       |  |
| <p><b>Cholesterol Lowering Agent</b><br/> <input type="checkbox"/> _____</p>                                                                                                                                                                                                                                                                                                                                                                                                                                            |  |  |                                                    |     |     |                                       |  |
| <p><b>Glycemic Management</b><br/> <input type="checkbox"/> Insulin as per signed Subcutaneous Insulin Order Set (form #103605 OR #103606)<br/> <input type="checkbox"/> Bedside Glucose Monitoring (BGM) <input type="checkbox"/> daily <input type="checkbox"/> BID <input type="checkbox"/> QID</p>                                                                                                                                                                                                                  |  |  |                                                    |     |     |                                       |  |
| <p><b>Bowel Management</b><br/> <input type="checkbox"/> docusate sodium 100 mg PO BID PRN<br/> <input type="checkbox"/> Other: _____</p>                                                                                                                                                                                                                                                                                                                                                                               |  |  |                                                    |     |     |                                       |  |
| <p><b>Cardiac Medications</b><br/> <input type="checkbox"/> nitroglycerin infusion _____ micrograms/minute<br/>           Titrate to pain or Systolic BP greater than _____ mmHg<br/> <input type="checkbox"/> nitroglycerin transdermal patch _____ mg apply daily for 12 hours: On at _____ h<br/> <input type="checkbox"/> nitroglycerin 0.4 mg spray SL q5minutes x 3 PRN</p>                                                                                                                                       |  |  |                                                    |     |     |                                       |  |
| <p><b>Nicotine Replacement</b><br/> <input type="checkbox"/> Nicotine Replacement Therapy as per signed orders (form #102844)</p>                                                                                                                                                                                                                                                                                                                                                                                       |  |  |                                                    |     |     |                                       |  |
| <p><b>Pain/Fever and Nausea Management</b><br/>           ***max acetaminophen from all sources 4,000 mg per 24 hours***<br/><br/> <b>Pain/Fever</b><br/> <input type="checkbox"/> acetaminophen 325 – 650 mg PO q4h PRN<br/> <input type="checkbox"/> Other: _____<br/><br/> <b>Nausea</b><br/> <input type="checkbox"/> dimenhydrinate 12.5 – 50 mg PO/IV q4h PRN (start with a lower dose if elderly/frail)<br/> <input type="checkbox"/> ondansetron 4 mg IV q6h PRN<br/> <input type="checkbox"/> Other: _____</p> |  |  |                                                    |     |     |                                       |  |
| <p><b>Sedation</b><br/> <input type="checkbox"/> No sedation<br/> <input type="checkbox"/> zopiclone 3.75 – 7.5 mg PO nightly PRN (Start with lower dose if elderly/frail)<br/> <input type="checkbox"/> Other: _____</p>                                                                                                                                                                                                                                                                                               |  |  |                                                    |     |     |                                       |  |
| <p><b>Additional Orders</b><br/>           _____<br/>           _____</p>                                                                                                                                                                                                                                                                                                                                                                                                                                               |  |  |                                                    |     |     |                                       |  |
| <p>_____</p>                                                                                                                                                                                                                                                                                                                                                                                                                                                                                                            |  |  |                                                    |     |     |                                       |  |
| <p>_____</p>                                                                                                                                                                                                                                                                                                                                                                                                                                                                                                            |  |  |                                                    |     |     |                                       |  |
| <p>_____<br/>           PRACTITIONER PRINTED NAME</p>                                                                                                                                                                                                                                                                                                                                                                                                                                                                   |  |  | <p>_____<br/>           PRACTITIONER SIGNATURE</p> |     |     | <p>_____<br/>           DATE/TIME</p> |  |

Notice of confidentiality: Contains information that is time sensitive or confidential. Use, disclosure, copying or communication of the contents is prohibited. If you have received in error, notify the SHR Pharmacy Manager, Operations (306-655-6695).
